# Supplementary material for: Establishment of Alfalfa Intercropped under Corn in Response to Varying Rates of Prohexadione with or without Fungicide Plus Insecticide
Source: MDPI journal article supplement (doi:10.3390/agronomy13112823), 2023-11-15
Supplement: s1 [file s1]

**Table S1.** Monthly total precipitation (mm) and average temperature (°C) near Arlington, Wisconsin USA relative to 30-year means from 1991 to 2020 (NOAA, [www.climate.gov](http://www.climate.gov)).

| Month     | Precipitation |      |            | Temperature |      |            |
|-----------|---------------|------|------------|-------------|------|------------|
|           | 2019          | 2020 | 30-yr mean | 2019        | 2020 | 30-yr mean |
| January   | 54            | 44   | 31         | -9.2        | -4.7 | -8.0       |
| February  | 76            | 24   | 36         | -8.7        | -6.2 | -5.9       |
| March     | 26            | 87   | 50         | -1.8        | 2.3  | 0.6        |
| April     | 74            | 35   | 95         | 7.1         | 6.1  | 7.4        |
| May       | 177           | 109  | 108        | 12.2        | 13.1 | 14.2       |
| June      | 103           | 111  | 131        | 18.8        | 20.4 | 19.7       |
| July      | 136           | 137  | 106        | 23.1        | 23.4 | 21.7       |
| August    | 123           | 91   | 97         | 19.7        | 20.9 | 20.6       |
| September | 137           | 110  | 85         | 17.9        | 15.3 | 16.3       |
| October   | 165           | 102  | 71         | 8.4         | 6.7  | 9.5        |
| November  | 60            | 70   | 57         | -1.5        | 5.5  | 1.9        |
| December  | 48            | 24   | 37         | -1.4        | -3.6 | -4.6       |
